# Supplementary material
Source: Springer Nature journal article supplement (https://www.springermedizin.de/resource/supplementary/13053_2013_455_MOESM6_ESM.pdf/9673890)
Supplement: MOESM6 [file 9673890]

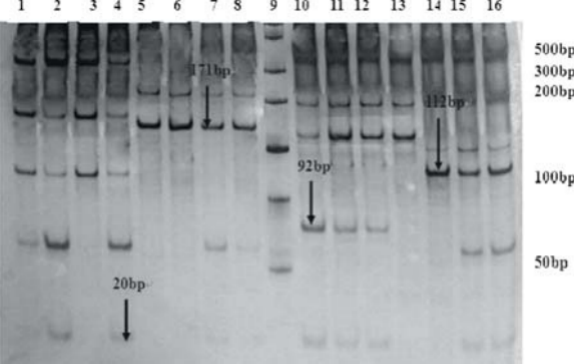

**Lane 10, 11, 12 : Homozygous C/C genotype**

**Lane 3 : Homozygous T/T genotype**

**Lane 9 : 50bp DNA Fragment Marker**

**Lane 1, 2, 4, 15, 16 : Heterozygous C/T genotype**
